# Supplementary material for: Discovery of a small molecule that inhibits Bcl-3-mediated cyclin D1 expression in melanoma cells
Source: Springer Nature journal article supplement (doi:10.1186/s12885-023-11663-y), 2024-01-18

Supplementary Figure 1

Original blots: Fig. 1B

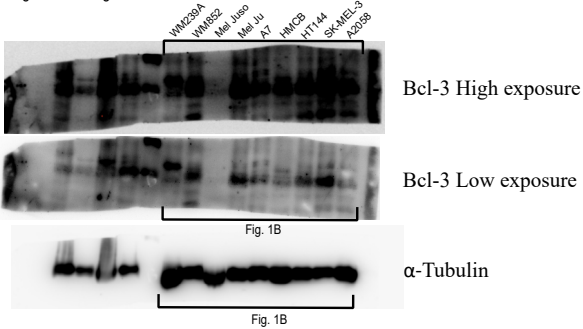

Original blots: Fig. 3D

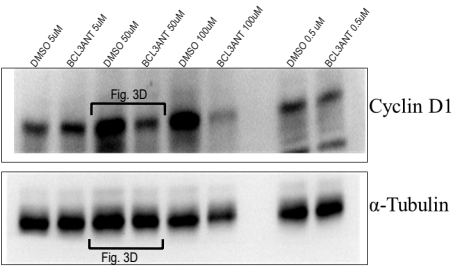

Supplement: MOESM1 [file 26639878]
